# Supplementary material for: Field-Induced Slow Magnetic Relaxation in CoII Cyclopropane-1,1-dicarboxylates
Source: MDPI journal article supplement (doi:10.3390/molecules27196537), 2022-10-03
Supplement: s1 [file s1]

# Supplementary Materials

## Field-Induced Slow Magnetic Relaxation in Co<sup>II</sup> Cyclopropane-1,1-dicarboxylates

Anna K. Matyukhina <sup>1</sup>, Ekaterina N. Zorina-Tikhonova <sup>1\*</sup>, Alexander S. Goloveshkin <sup>2</sup>, Konstantin A. Babeshkin <sup>1</sup>, Nikolay N. Efimov <sup>1</sup>, Mikhail A. Kiskin <sup>1</sup> and Igor L. Eremanko <sup>1</sup>

<sup>1</sup> N.S. Kurnakov Institute of General and Inorganic Chemistry of the Russian Academy of Sciences, Leninsky  
Prosp. 31, 119991 Moscow, Russia

<sup>2</sup> A.N. Nesmeyanov Institute of Organoelement Compounds of the Russian Academy of Sciences, Vavilov St., 28,  
119934 Moscow, Russia

\* Correspondence: ezorinatikhonova@gmail.com

### Table of contents

**S-1. Powder X-Ray diffraction data**

**S-2. Coordination modes of the cyclopropane-1,1-dicarboxylate dianions**

**S-3. Interatomic distances and angles**

**S-4. AC data**

**S-5. AILFT**

**S-6. Single crystal X-Ray diffraction data**

**S-7. H-bonds for 1 and 2.**

### S-1. Powder X-Ray diffraction data

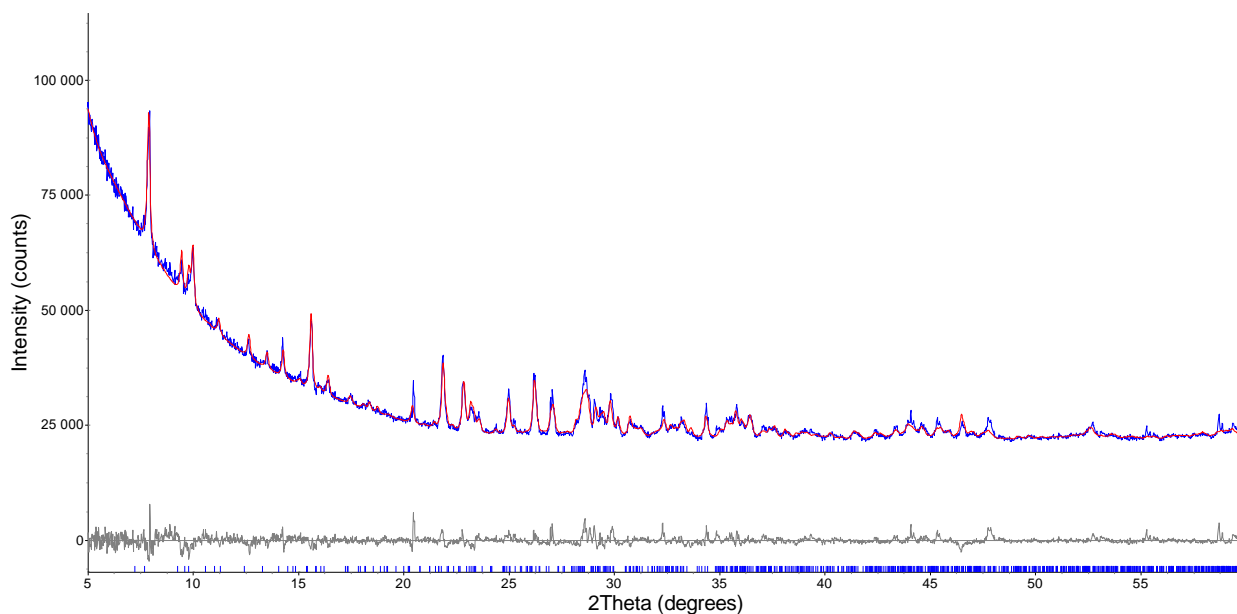

**Figure S1.1.** The experimental (blue line) and calculated (red line) powder patterns for compound **1** and their difference (grey curve). Blue ticks indicated calculated positions of the peaks.

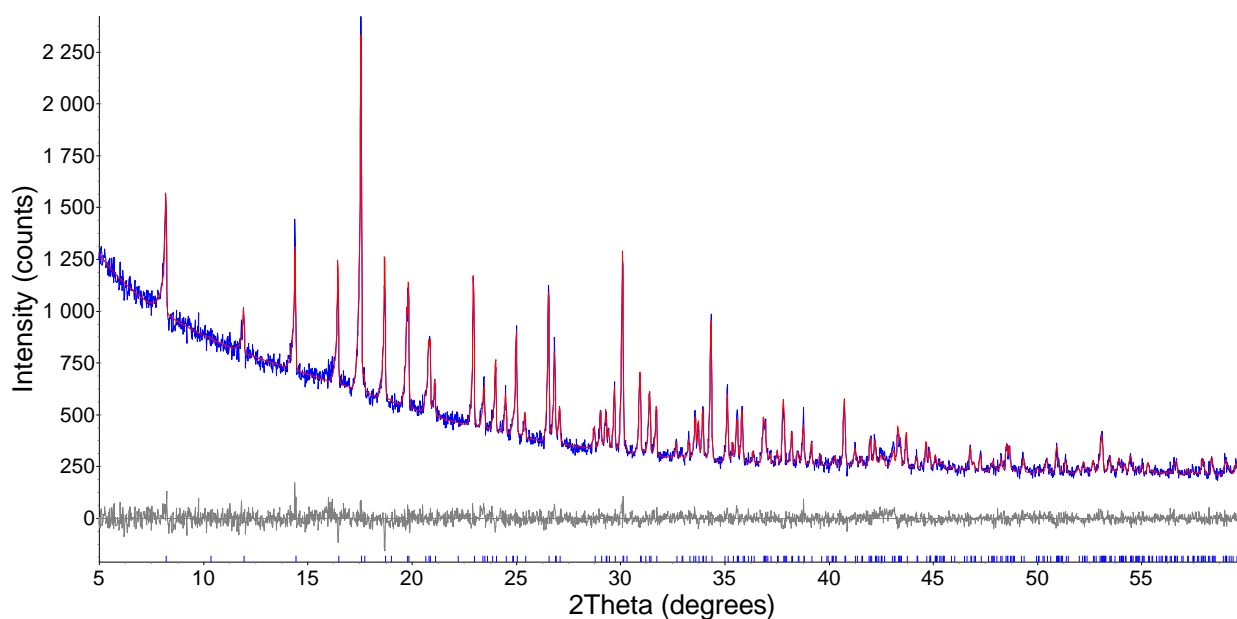

**Figure S1.2.** The experimental (blue line) and calculated (red line) powder patterns for compound **2** and their difference (grey curve). Blue ticks indicated calculated positions of the peaks.

## S-2. Coordination modes of the cyclopropane-1,1-dicarboxylate dianions

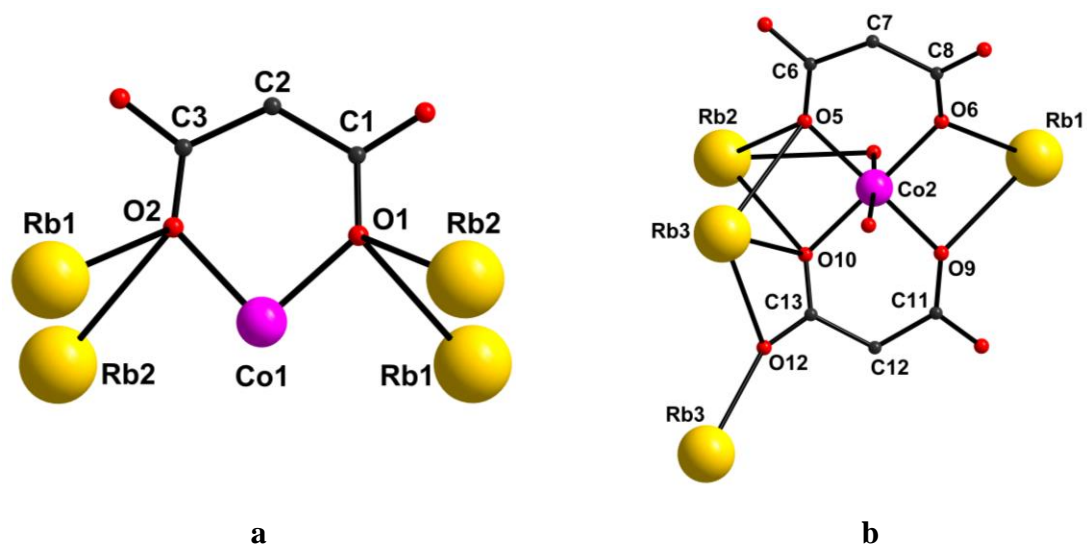

**Figure S2.1.** Coordination modes of the cyclopropane-1,1-dicarboxylate dianions for **1**

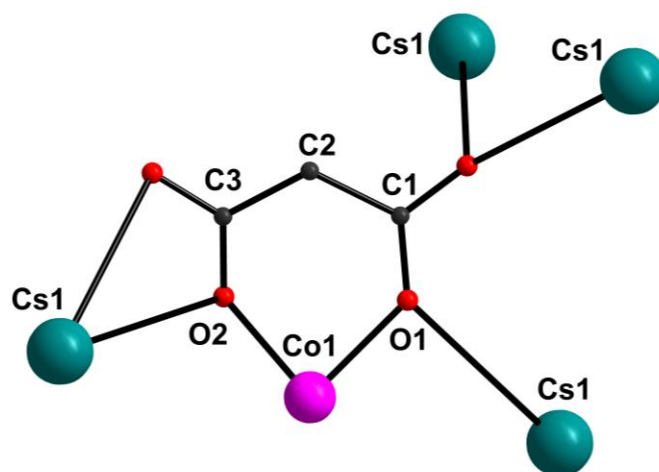

**Figure S2.2.** Coordination modes of the cyclopropane-1,1-dicarboxylate dianions for **2**

### S-3. Interatomic distances and angles

**Table S1.** Selected interatomic distances [ $\text{\AA}$ ] and angles [ $^\circ$ ] for **1** and **2**

| Complex                                 | <b>1</b>            | <b>2</b>              |
|-----------------------------------------|---------------------|-----------------------|
| Co-O (cpdc <sup>2-</sup> )              | 2.027(3)–2.056(3)   | 2.0510(16)–2.0550(15) |
| Co-O (H <sub>2</sub> O)                 | 2.127(2)–2.145(3)   | 2.1258(17)            |
| M <sup>I</sup> -O (cpdc <sup>2-</sup> ) | 2.884(3)–3.222(3)   | 3.1920(2)–3.5114(17)  |
| M <sup>I</sup> -O (H <sub>2</sub> O)    | 2.729(19)–3.203(3)  | 3.0940(2)–3.3240(2)   |
| O-Co-O                                  | 87.18(10)–88.15(10) | 86.74(6)              |
| Co...Co                                 | 6.4854(6)           | 5.2648(2)             |
| Co...M <sup>I</sup>                     | 3.6875(8)           | 4.0774(2)             |
| M <sup>I</sup> ...M <sup>I</sup>        | 4.0960(5)           | 5.2648(3)             |

## S-4. AC-data

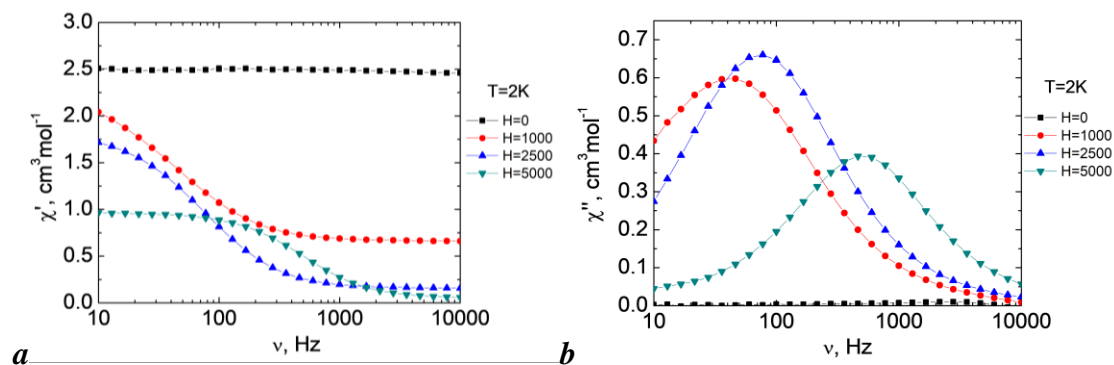

**Figure S3.1.** Frequency dependencies of real,  $\chi'$  (a) and imaginary,  $\chi''$  (b) components of dynamic magnetic susceptibility for complex **1** at  $T = 2$  K under various dc magnetic fields. Solid lines are visual guides.

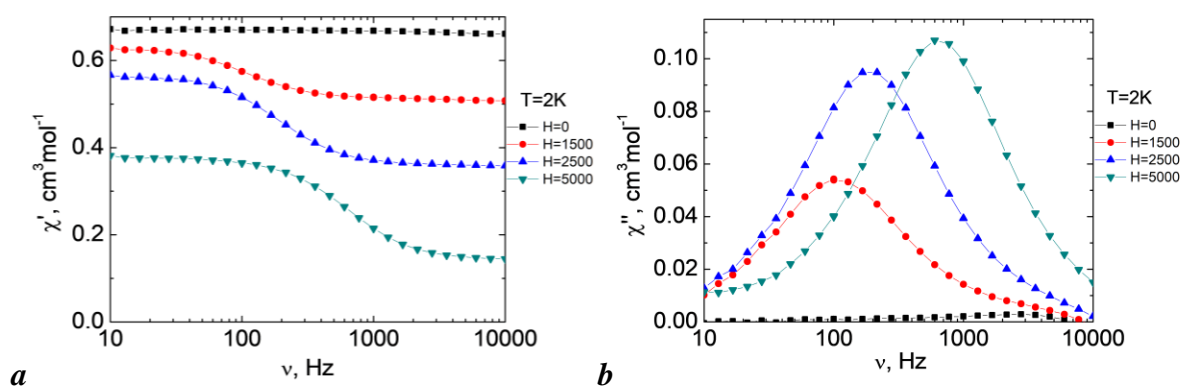

**Figure S3.2.** Frequency dependencies of real,  $\chi'$  (a) and imaginary,  $\chi''$  (b) components of dynamic magnetic susceptibility for complex **2** at  $T = 2$  K under various dc magnetic fields. Solid lines are visual guides.

**S-5. Ab initio ligand field theory****Table S2.** Relative energies of d-AO in complexes **1** and **2**

| Complex                      | <b>1</b>                 |                          | <b>2</b>              |
|------------------------------|--------------------------|--------------------------|-----------------------|
|                              | Co1                      | Co2                      | Co1                   |
| Energies [cm <sup>-1</sup> ] | 0 ( $d_{xy}$ )           | 0 ( $d_{xy}$ )           | 0 ( $d_{x^2-y^2}$ )   |
|                              | 604.5 ( $d_{xz}$ )       | 384.6 ( $d_{yz}$ )       | 487.2 ( $d_{xz}$ )    |
|                              | 1709.4 ( $d_{yz}$ )      | 1765.4 ( $d_{xz}$ )      | 1811.8 ( $d_{yz}$ )   |
|                              | 6269.3 ( $d_{x^2-y^2}$ ) | 6055.6 ( $d_{x^2-y^2}$ ) | 6413.7 ( $d_{xy}$ )   |
|                              | 10647.4 ( $d_{z^2}$ )    | 10754.9 ( $d_{z^2}$ )    | 10542.7 ( $d_{z^2}$ ) |

**S-6. Single crystal X-Ray diffraction data****Table S3.** Crystal data and structure refinement for **1** and **2**

| Compounds                                | <b>1</b>                                                                                          | <b>2</b>                                                               |
|------------------------------------------|---------------------------------------------------------------------------------------------------|------------------------------------------------------------------------|
| CCDC                                     | 2161285                                                                                           | 2161284                                                                |
| Formula                                  | $\{[\text{Co}_3\text{Rb}_6(\text{cpdc})_6(\text{H}_2\text{O})_{12}]\cdot 6\text{H}_2\text{O}\}_n$ | $[\text{CoCs}_2(\text{cpdc})_2(\text{H}_2\text{O})_6]_n$               |
| Molecular formula, <i>M</i>              | $\text{C}_{30}\text{H}_{60}\text{Co}_3\text{O}_{42}\text{Rb}_6$ , 1782.39                         | $\text{C}_{10}\text{H}_{20}\text{CoCs}_2\text{O}_{14}$ , 689.01        |
| Temperature [K]                          | 296.15                                                                                            | 296.15                                                                 |
| Crystal system, space group              | Triclinic, $P\bar{1}$                                                                             | monoclinic, $P2_1/c$                                                   |
| <i>a</i> [Å]                             | 10.4873(3)                                                                                        | 10.9378(5)                                                             |
| <i>b</i> [Å]                             | 12.5920(4)                                                                                        | 5.2648(2)                                                              |
| <i>c</i> [Å]                             | 12.6360(5)                                                                                        | 17.3362(8)                                                             |
| $\alpha$ [°]                             | 78.0790(10)                                                                                       |                                                                        |
| $\beta$ [°]                              | 66.7330(10)                                                                                       | 100.972(2)                                                             |
| $\gamma$ [°]                             | 78.8820(10)                                                                                       |                                                                        |
| <i>V</i> [Å <sup>3</sup> ]               | 1488.37(9)                                                                                        | 980.06(7)                                                              |
| <i>Z</i> , density [g/cm <sup>3</sup> ]  | 1, 1.989                                                                                          | 2, 2.335                                                               |
| $\mu$ [mm <sup>-1</sup> ]                | 5.804                                                                                             | 4.602                                                                  |
| <i>F</i> (000)                           | 879                                                                                               | 658                                                                    |
| Crystal size                             | 0.25×0.10×0.03                                                                                    | 0.30×0.12×0.01                                                         |
| $\theta_{\text{min-max}}$ range [°]      | 2.211–31.290                                                                                      | 4.377–30.594                                                           |
| Index ranges                             | $-14 \leq h \leq 15$ ,<br>$-14 \leq k \leq 17$ ,<br>$-18 \leq l \leq 17$                          | $-15 \leq h \leq 15$ ,<br>$-7 \leq k \leq 6$ ,<br>$-24 \leq l \leq 24$ |
| Refl. collected/unique                   | 20372/9363                                                                                        | 11249/2967                                                             |
| Refl. [ $I > 2\sigma(I)$ ]               | 5309                                                                                              | 2724                                                                   |
| <i>R</i> <sub>int</sub>                  | 0.0499                                                                                            | 0.0274                                                                 |
| Goodness-of-fit on <i>F</i> <sup>2</sup> | 0.986                                                                                             | 1.144                                                                  |
| Final <i>R</i> indices                   | <i>R</i> <sub>1</sub> = 0.0490, <i>wR</i> <sub>2</sub> = 0.0933                                   | <i>R</i> <sub>1</sub> = 0.0270, <i>wR</i> <sub>2</sub> = 0.0506        |
| <i>R</i> indices (all data)              | <i>R</i> <sub>1</sub> = 0.1116, <i>wR</i> <sub>2</sub> = 0.1114                                   | <i>R</i> <sub>1</sub> = 0.0309, <i>wR</i> <sub>2</sub> = 0.0517        |
| Diff. peak/hole [e·Å <sup>-3</sup> ]     | 1.039/−1.096                                                                                      | 0.744/−0.858                                                           |

## S-7. H-bonds

**Table S4.** H-bonds for **1** and **2**

//the analysis was done using PLATON software [A.L.Spek, Acta Cryst. 2009, D65, 148-155]//

| D-H...A         | D-H [Å] | H...A [Å] | D...A [Å] | D-H-A [°] | Symmetry index   |
|-----------------|---------|-----------|-----------|-----------|------------------|
| Complex 1       |         |           |           |           |                  |
| O1W-H1Wa...O7   | 0.85    | 1.85      | 2.693(4)  | 173.6     | -1+x, +y, +z     |
| O1W-H2Wa...O4   | 0.85    | 1.89      | 2.664(4)  | 151.4     |                  |
| O2W-H2Wa...O4   | 0.85    | 1.92      | 2.759(4)  | 169.0     | 1+x, +y, +z      |
| O2W-H2Wb...O4   | 0.85    | 2.01      | 2.721(4)  | 140.9     | -x, 1-y, 1-z     |
| O3W-H3Wa...O8   | 0.96    | 1.76      | 2.669(4)  | 157.2     | -x, 1-y, 1-z     |
| O3W-H3Wb...O5Wa | 0.90    | 2.04      | 2.775(4)  | 138.4     | -x, 1-y, 1-z     |
| O3W-H3Wb...O5Wb | 0.90    | 1.91      | 2.807(18) | 172.0     | -x, 1-y, 1-z     |
| O4W-H4Wa...O9W  | 0.85    | 2.14      | 2.831(7)  | 138.3     |                  |
| O4W-H4Wb...O4   | 0.85    | 1.98      | 2.823(4)  | 169.9     | 1+x, +y, +z      |
| O5Wa-H5Wa...O7  | 0.85    | 1.87      | 2.721(4)  | 179.6     | -1+x, +y, +z     |
| O5Wa-H5Wb...O7W | 0.85    | 1.89      | 2.736(6)  | 179.5     |                  |
| O6W-H6Wa...O8W  | 0.85    | 1.94      | 2.775(6)  | 167.7     | +x, +y, 1+z      |
| O6W-H6Wb...O11  | 0.85    | 1.93      | 2.754(4)  | 164.7     | 1+x, +y, +z      |
| O7W-H7Wa...O3   | 0.85    | 1.93      | 2.755(6)  | 164.1     |                  |
| O8W-H8Wa...O8   | 0.94    | 2.00      | 2.756(5)  | 135.7     |                  |
| O9W-H9Wb...O3   | 0.85    | 1.84      | 2.678(6)  | 169.1     | 1-x, -y, 2-z     |
| Complex 2       |         |           |           |           |                  |
| O1W-H1Wa...O2   | 0.81    | 1.978     | 2.769     | 164.1     |                  |
| O1W-H1Wb...O2W  | 0.82    | 1.906     | 2.723     | 173.0     | +x, 1/2-y, 1/2+z |
| O2W-H2Wa...O3   | 0.82    | 1.940     | 2.736     | 162.1     |                  |
| O2W-H2Wb...O1   | 0.82    | 2.152     | 2.962     | 167.5     | -x, 1/2+y, 1/2-z |
| O3W-H3Wa...O4   | 0.82    | 2.075     | 2.841     | 156.5     | -x, 2-y, 1-z     |
| O3W-H3Wb...O4   | 0.81    | 1.986     | 2.800     | 178.0     | 1+x, +y, +z      |
